# Supplementary material for: Radiographic endophenotyping in hip osteoarthritis improves the precision of genetic association analysis
Source: PubMed Central journal article supplement (PMC5530347; doi:10.1136/annrheumdis-2016-210373), 2017-06-09
Supplement: annrheumdis-2016-210373supp001.pdf [file annrheumdis-2016-210373supp001.pdf]

## SUPPLEMENTARY MATERIAL

### SUPPLEMENTARY FIGURES

**Figure S1.** QQ and Manhattan plots for primary within OA case/control analyses of hip OA stratified by anatomic pattern of joint involvement and by bone remodeling response. (a) GWAS meta-analysis of hip OA cases with superior joint space narrowing vs. hip OA cases with axial, medial and concentric pattern; (b) GWAS meta-analysis of hip OA cases with axial/medial joint space narrowing vs. hip OA cases with superior and concentric pattern; (c) GWAS meta-analysis of hip OA cases with hypertrophic bone response vs. hip OA cases with atrophic and normotrophic bone response; (d) GWAS of hip OA cases with atrophic bone response vs. hip OA cases with hypertrophic and normotrophic bone response.

(a)

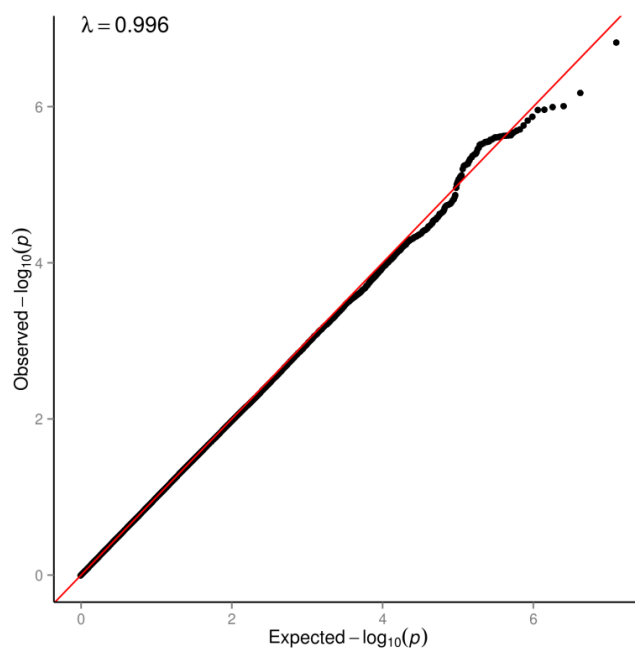

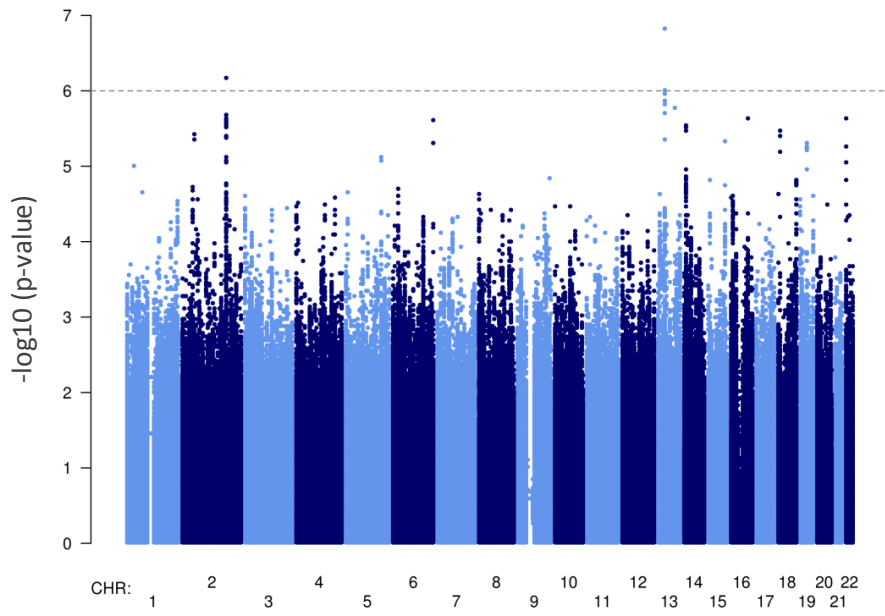

(b)

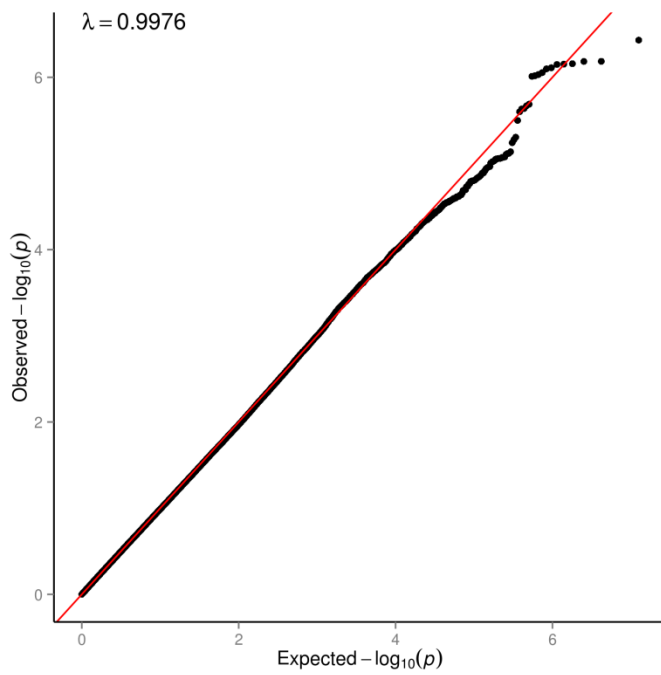

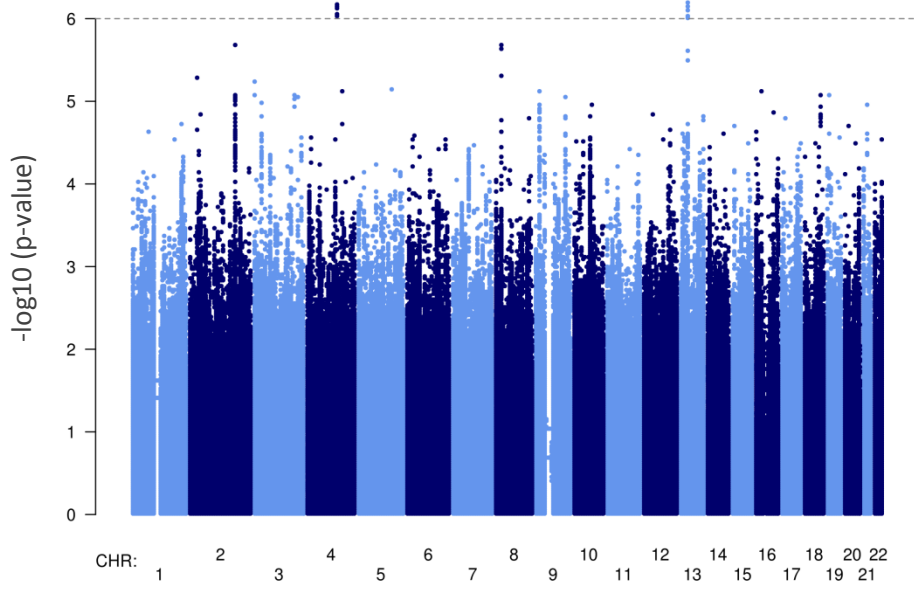

(c)

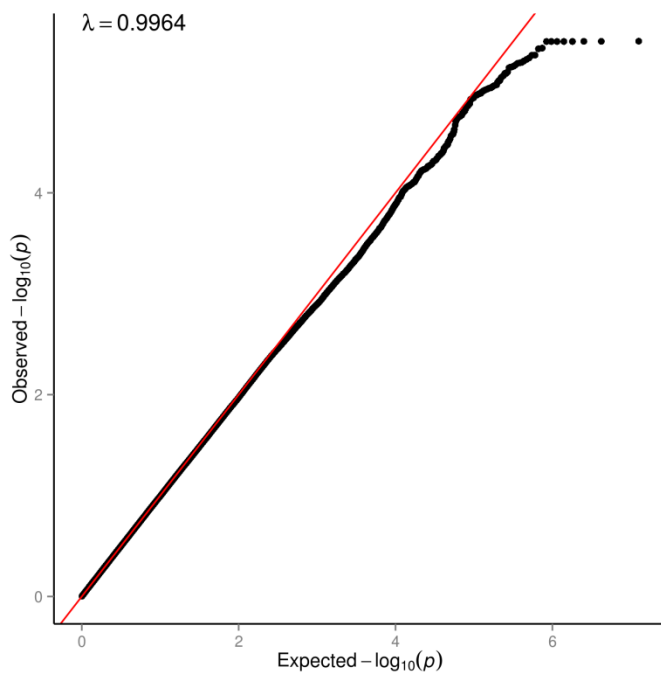

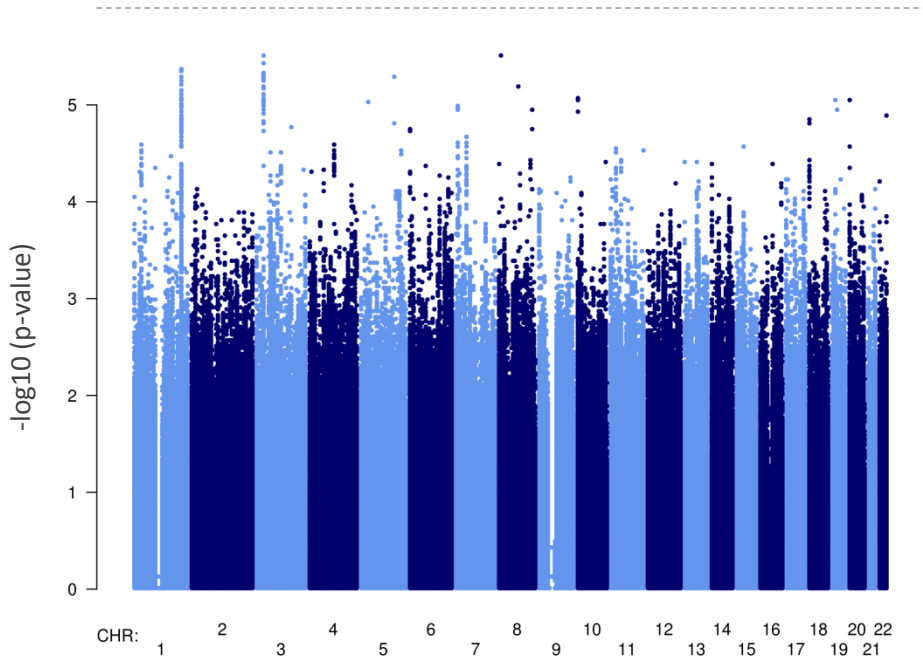

(d)

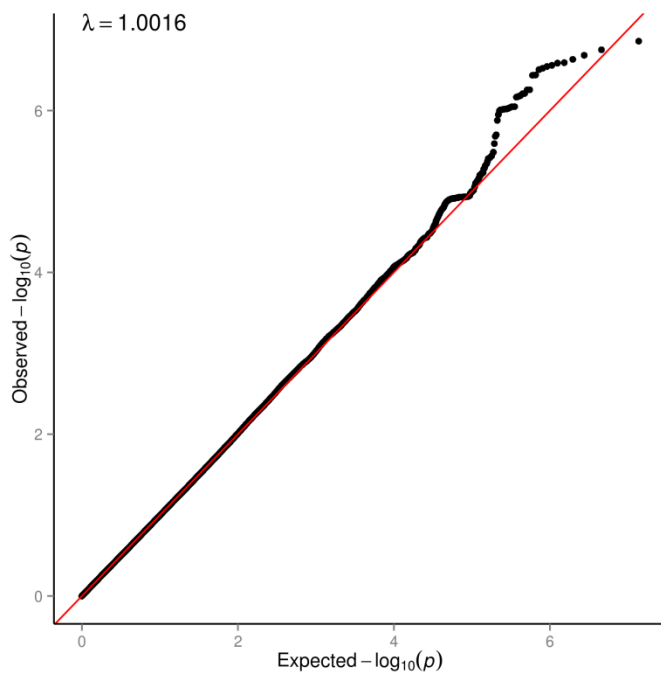

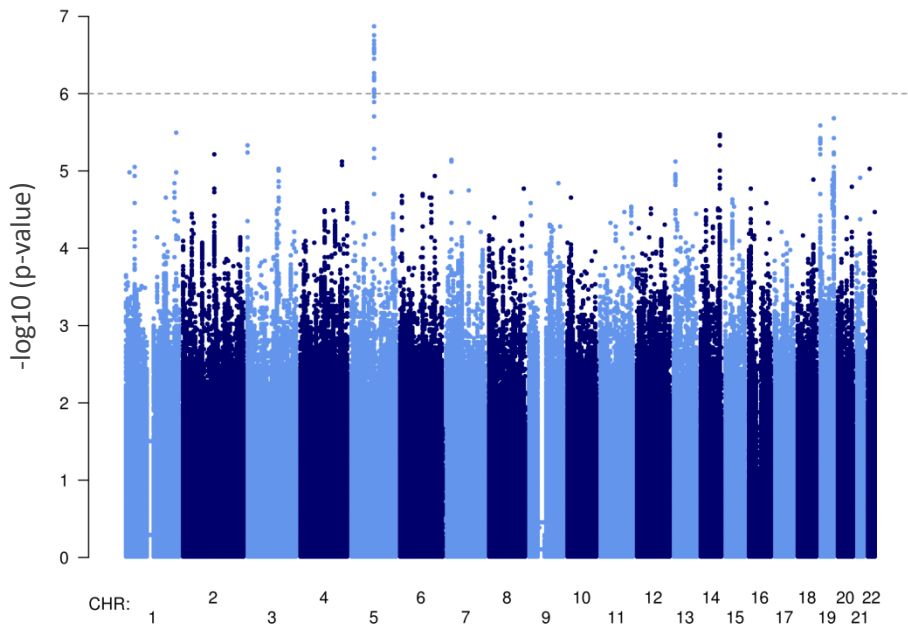

**Figure S2.** Regional association plots for top signals.

The purple dot denotes the p-value of the index variant and the colour of the other dots shows the pairwise linkage disequilibrium ( $r^2$ ) with neighbouring variants in the region of association based on the 1000 Genomes EUR panel. (a) Association at the rs754106 locus in the GWAS meta-analysis of hip OA cases with superior joint space narrowing vs. cases with non-superior joint space narrowing. (b) Association at the rs73023563 locus in the GWAS meta-analysis of hip OA cases with superior joint space narrowing vs. cases with non-superior joint space narrowing. (c) Association at the rs17050727 locus in the GWAS meta-analysis of hip OA cases with axial/medial joint space narrowing vs. cases with non-axial/medial joint space narrowing. (d) Association at the rs6766414 locus in the GWAS meta-analysis of hip OA cases with hypertrophic bone response vs. non-hypertrophic response. (e) Association at the rs61837881 locus in the GWAS meta-analysis of hip OA cases with hypertrophic bone response vs. non-hypertrophic response. (f) Association at the rs61837881 locus in the GWAS of hip OA cases with atrophic bone response vs. non-atrophic hip OA cases.

(a)

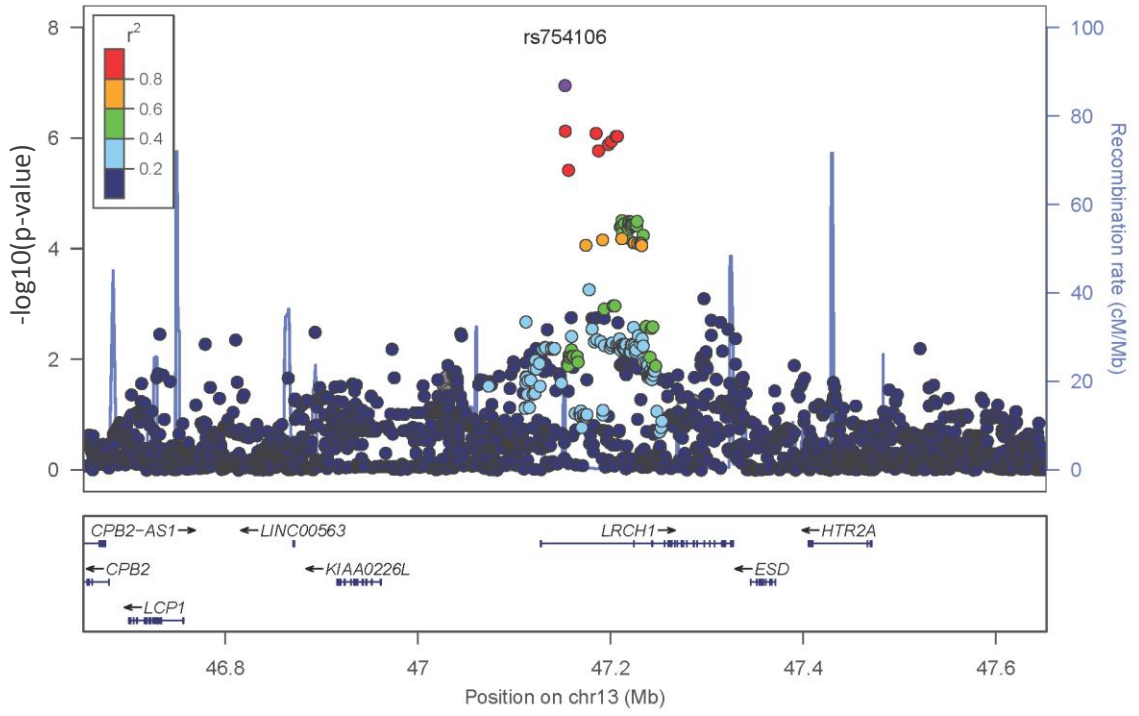

(b)

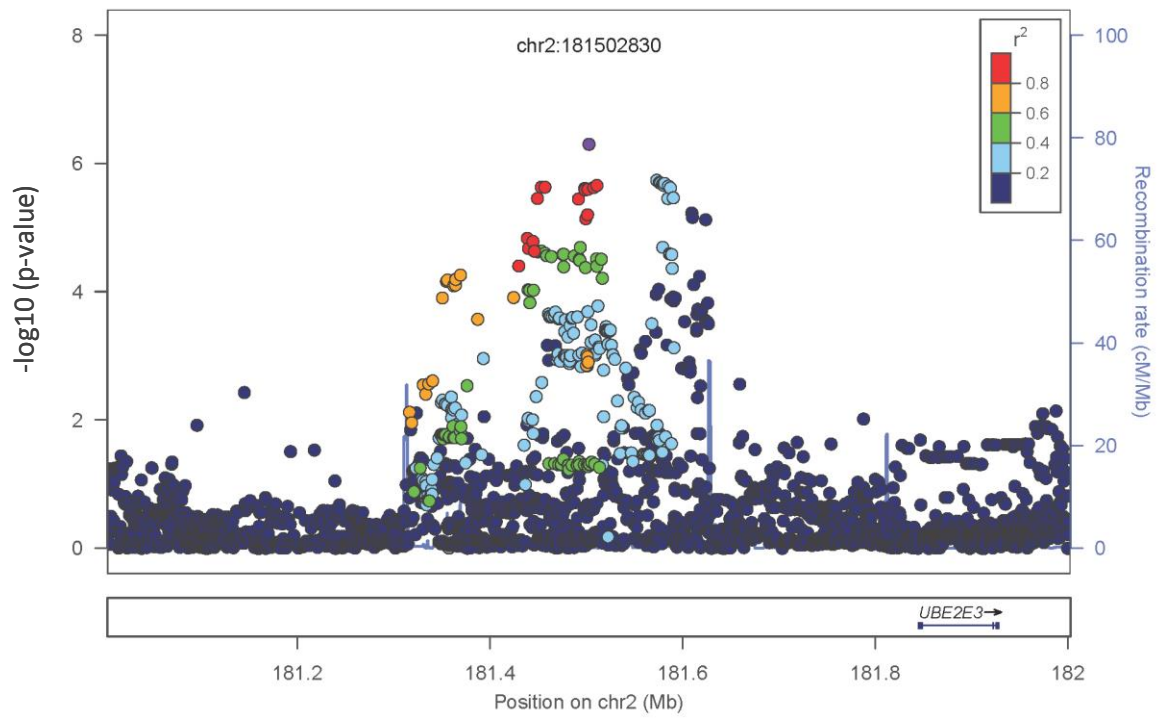

(c)

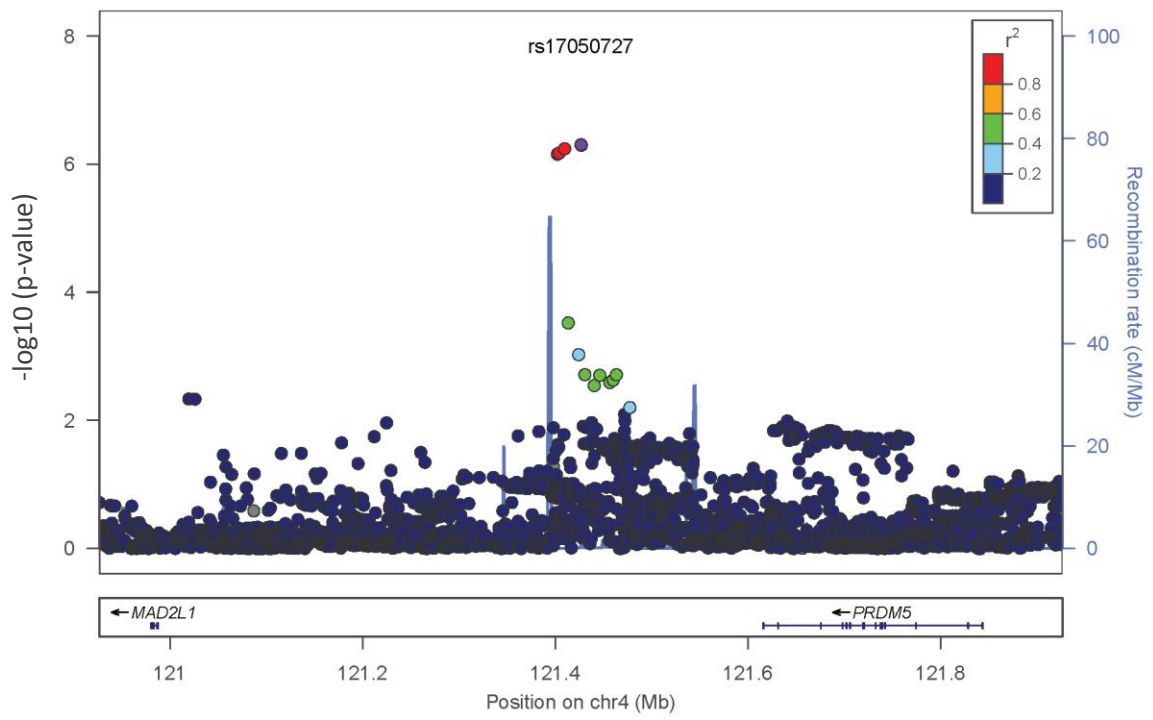

(d)

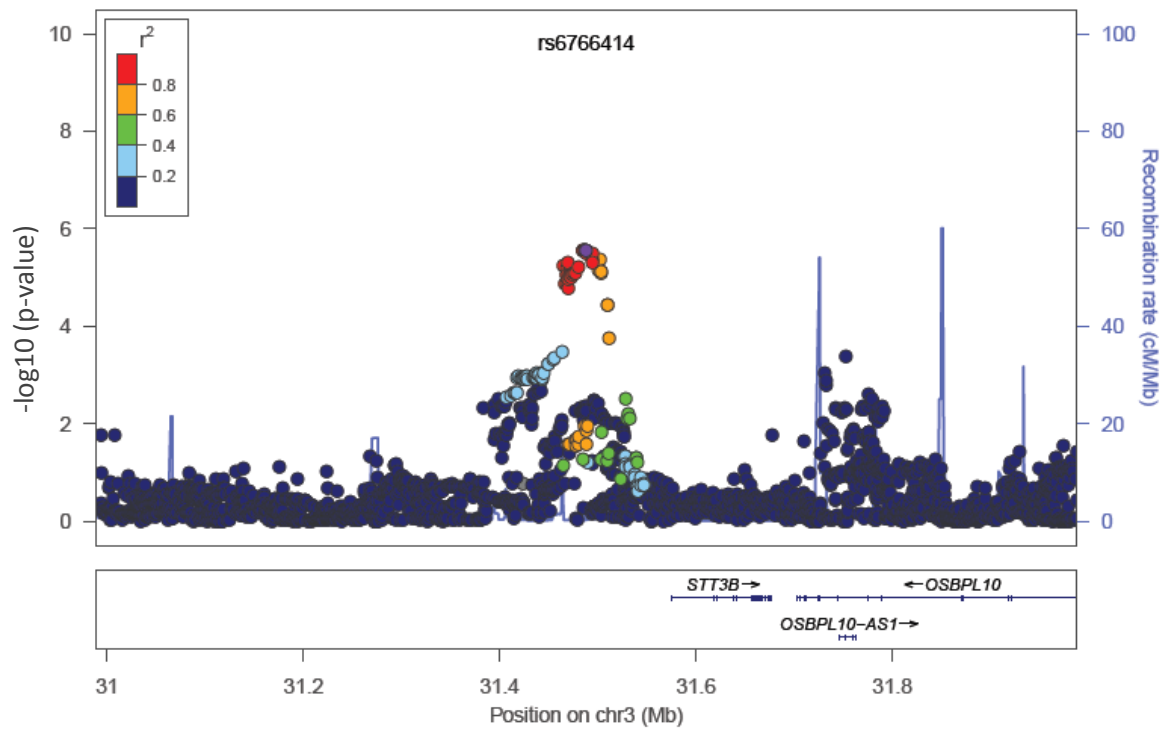

(e)

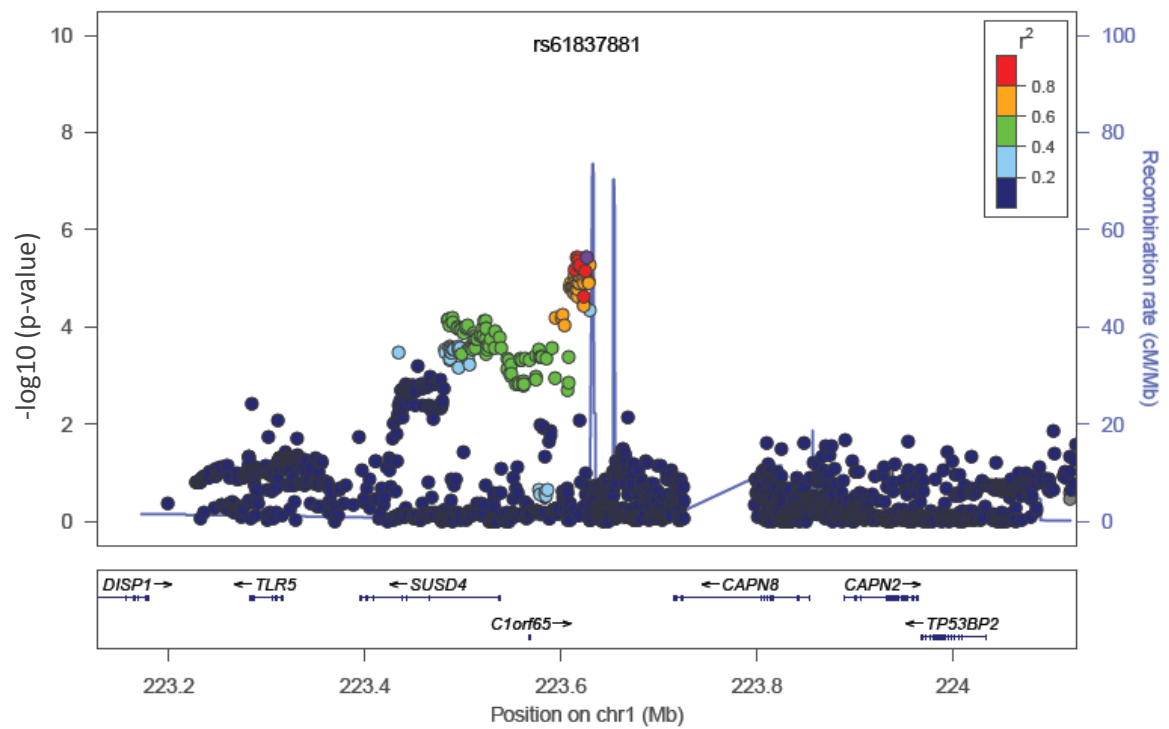



(f)

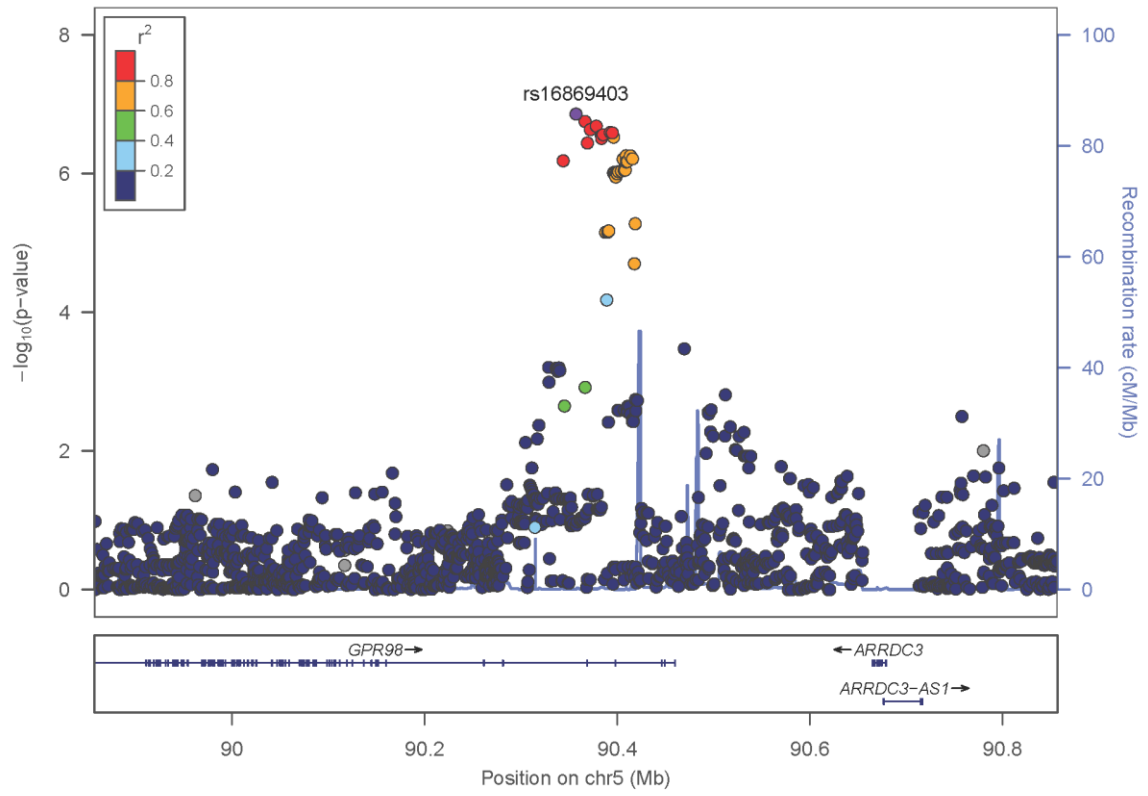

**Figure S3.** QQ and Manhattan plots for secondary analyses of hip OA stratified by anatomic pattern of joint involvement and by bone remodelling response vs. population-based controls and of all hip OA cases vs. population-based controls. (a) GWAS of hip OA cases with superior joint space narrowing vs. population-based controls; (b) GWAS of hip OA cases with axial/medial joint space narrowing vs. population-based controls; (c) GWAS of hip OA cases with hypertrophic bone response vs. population-based controls; (d) GWAS of hip OA cases with atrophic bone response vs. population-based controls; (e) GWAS of hip OA cases vs. population-based controls.

(a)

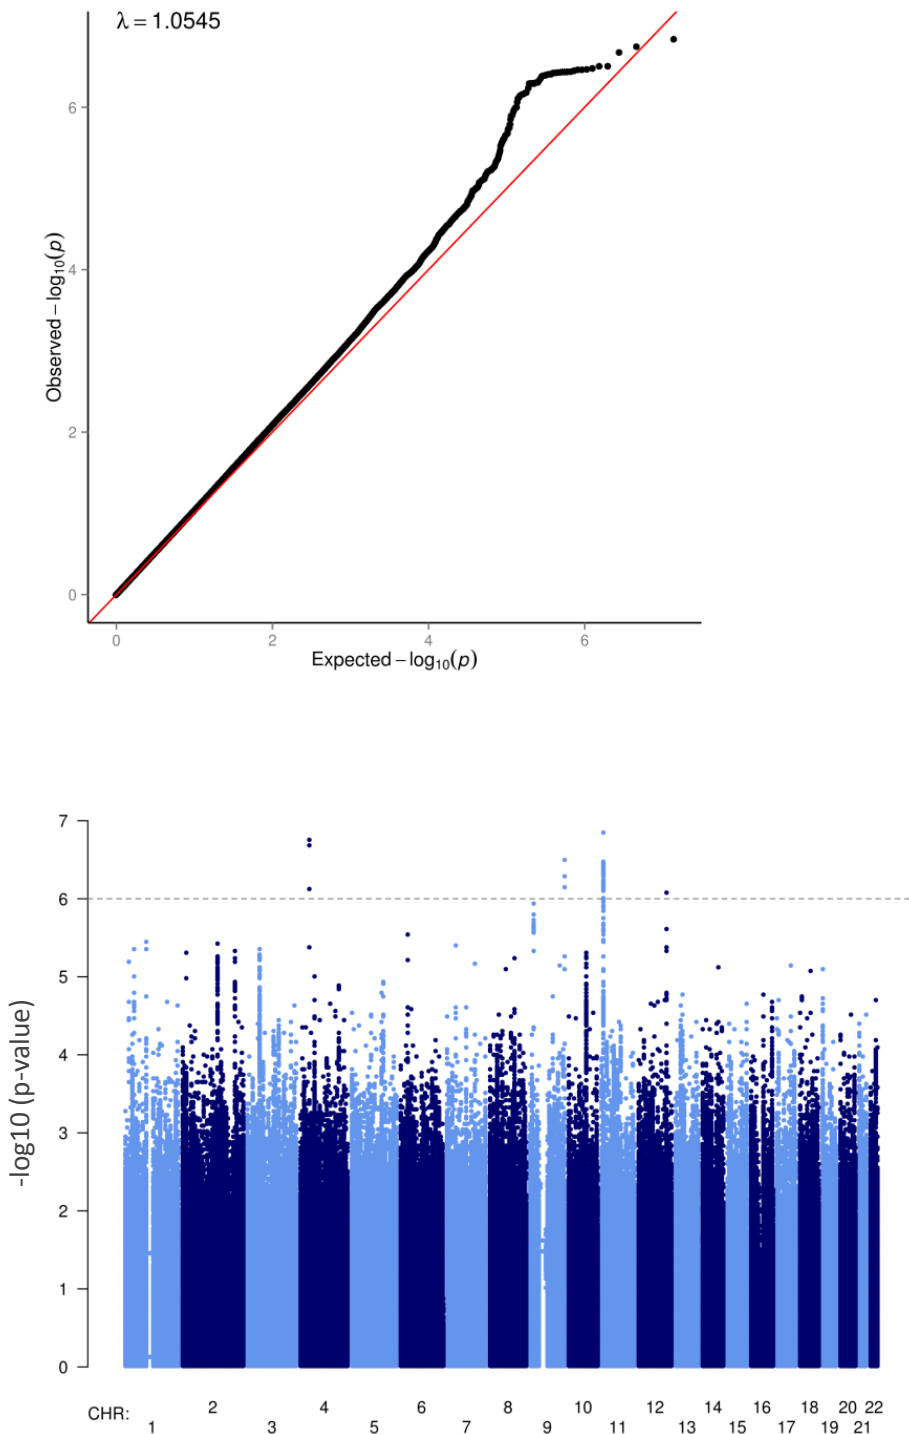

(b)

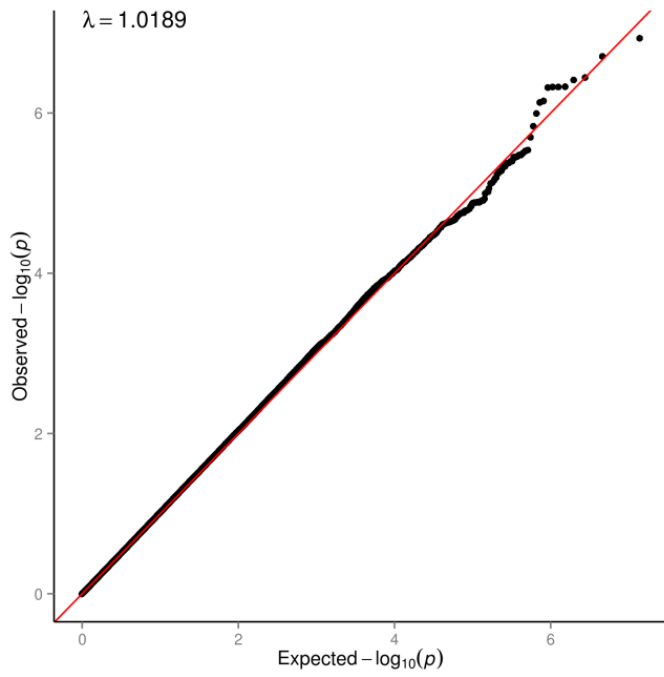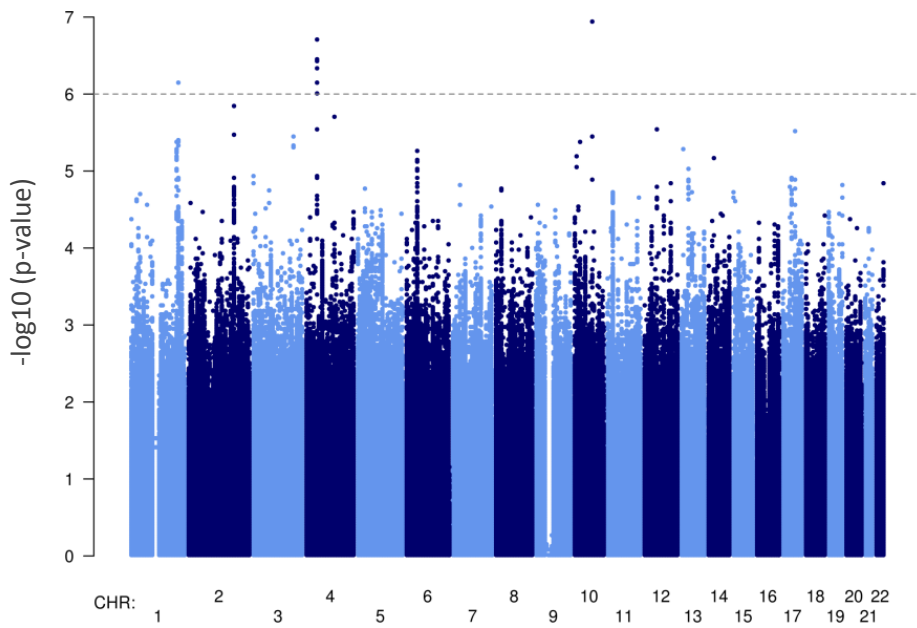

(c)

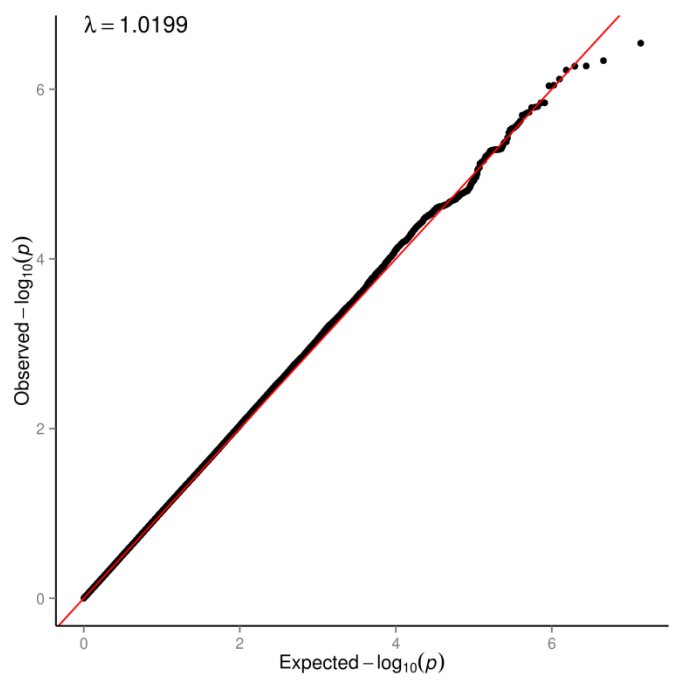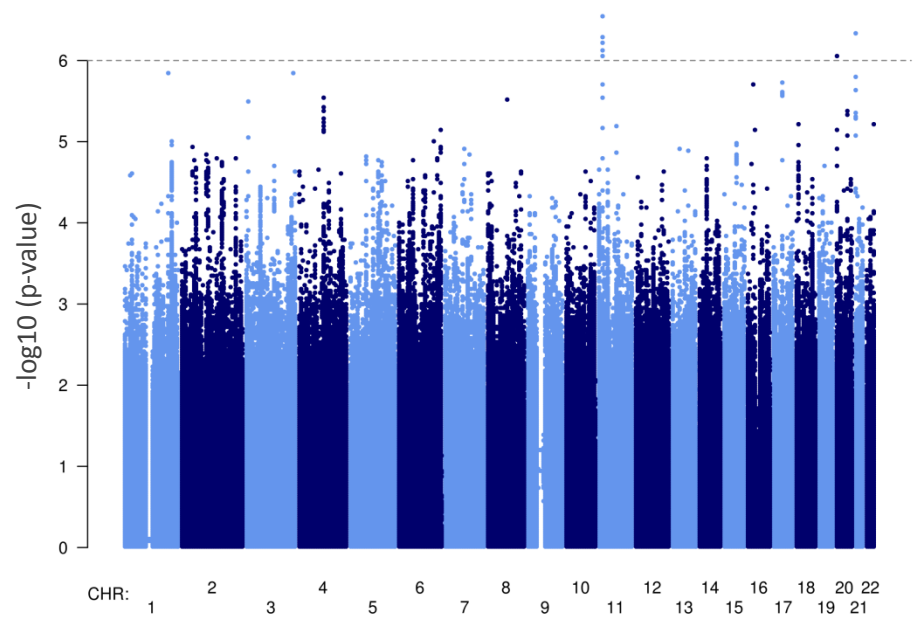

(d)

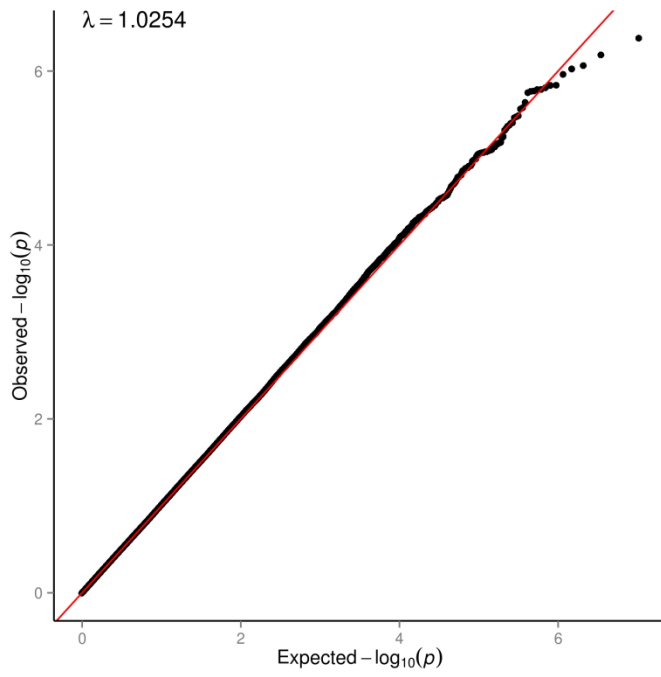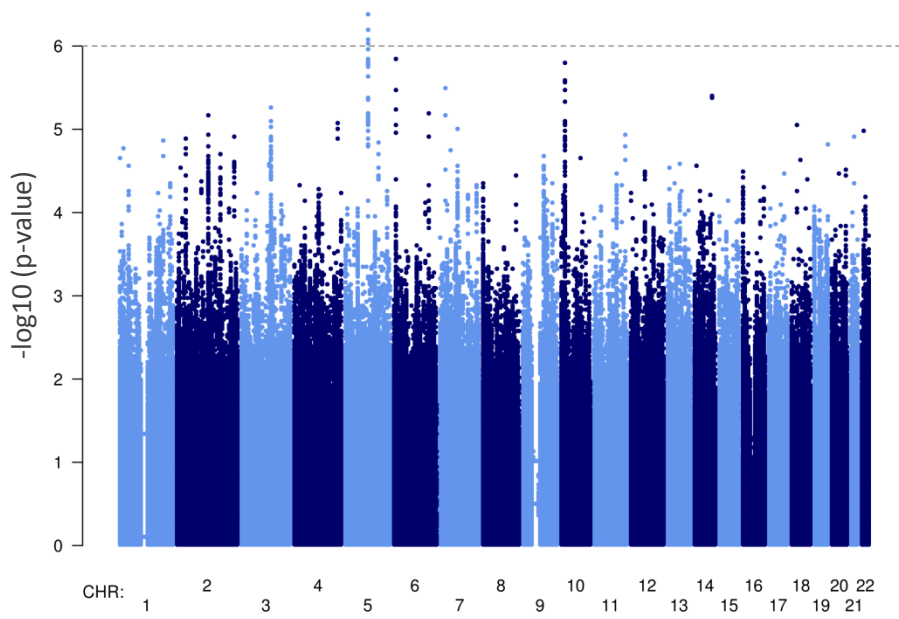

(e)

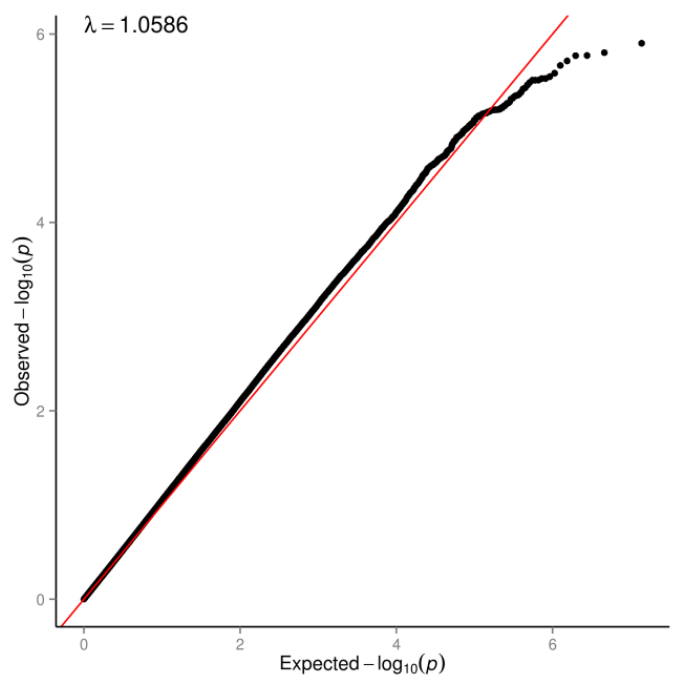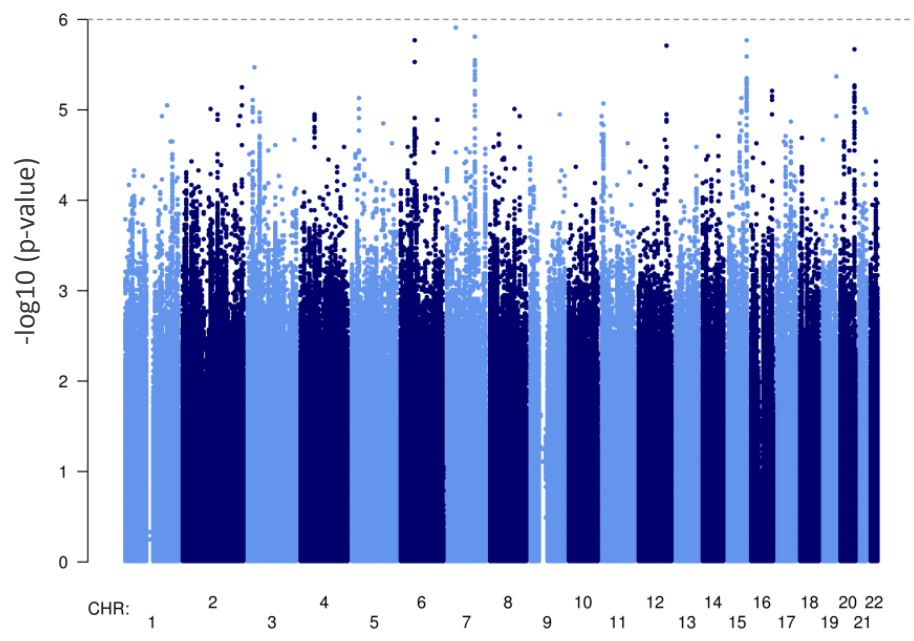

## SUPPLEMENTARY TABLES

**Table S1.** Summary statistics of the associated variants across relevant strata. The stratum in which the strength of association was greater for each variant is shown in bold.

SNP, single nucleotide polymorphism; EA, effect allele; EAF, effect allele frequency; Q<sub>p</sub>, Cochran's heterogeneity statistic's p-value; I<sup>2</sup>, heterogeneity index; OA, osteoarthritis; JSN, joint space narrowing.

| SNP        | EA                       | Analysis                     | Definition of cases                 | Definition of controls                  | N case/control  | EAF case/control | OR[95%CI]              | P               | Q <sub>p</sub> | I <sup>2</sup> (%) |
|------------|--------------------------|------------------------------|-------------------------------------|-----------------------------------------|-----------------|------------------|------------------------|-----------------|----------------|--------------------|
| rs754106   | T                        | <b>Meta-analysis</b>         | <b>Hip OA with superior JSN</b>     | <b>Hip OA with non-superior JSN</b>     | <b>1469/649</b> | <b>0.51/0.60</b> | <b>0.70[0.61-0.80]</b> | <b>1.49E-07</b> | <b>0.19</b>    | <b>41</b>          |
|            |                          | GWAS set 1                   | Hip OA with superior JSN            | Hip OA with non-superior JSN            | 1265/552        | 0.52/0.60        | 0.72[0.62-0.83]        | 7.95E-06        |                |                    |
|            |                          | GWAS set 2                   | Hip OA with superior JSN            | Hip OA with non-superior JSN            | 204/97          | 0.49/0.63        | 0.55[0.38-0.80]        | 1.37E-03        |                |                    |
|            |                          | GWAS                         | Hip OA with superior JSN            | Population-based                        | 1265/6500       | 0.52/0.54        | 0.91[0.84-0.99]        | 3.43E-02        |                |                    |
|            |                          | <b>Meta-analysis</b>         | <b>Hip OA with axial/medial JSN</b> | <b>Hip OA with non-axial/medial JSN</b> | <b>501/1617</b> | <b>0.61/0.52</b> | <b>1.47[1.27-1.70]</b> | <b>3.66E-07</b> | <b>0.34</b>    | <b>0</b>           |
|            |                          | GWAS set 1                   | Hip OA with axial/medial JSN        | Hip OA with non-axial/medial JSN        | 425/1392        | 0.61/0.52        | 1.43[1.22-1.67]        | 9.63E-06        |                |                    |
|            |                          | GWAS set 2                   | Hip OA with axial/medial JSN        | Hip OA with non-axial/medial JSN        | 76/225          | 0.63/0.50        | 1.76[1.18-2.63]        | 4.57E-03        |                |                    |
|            |                          | GWAS                         | Hip OA with axial/medial JSN        | Population-based                        | 425/6500        | 0.61/0.54        | 1.32[1.14-1.52]        | 1.39E-04        |                |                    |
| rs73023563 | T                        | <b>Meta-analysis</b>         | <b>Hip OA with superior JSN</b>     | <b>Hip OA with non-superior JSN</b>     | <b>1469/649</b> | <b>0.21/0.14</b> | <b>1.59[1.33-1.91]</b> | <b>6.59E-07</b> | <b>0.56</b>    | <b>0</b>           |
|            |                          | GWAS set 1                   | Hip OA with superior JSN            | Hip OA with non-superior JSN            | 1265/552        | 0.21/0.14        | 1.63[1.33-1.99]        | 6.22E-07        |                |                    |
|            |                          | GWAS set 2                   | Hip OA with superior JSN            | Hip OA with non-superior JSN            | 204/97          | 0.21/0.17        | 1.40[0.87-2.25]        | 1.60E-01        |                |                    |
|            |                          | GWAS                         | Hip OA with superior JSN            | Population-based                        | 1265/6500       | 0.21/0.20        | 1.07[0.97-1.19]        | 1.93E-01        |                |                    |
|            |                          | <b>Meta-analysis</b>         | <b>Hip OA with axial/medial JSN</b> | <b>Hip OA with non-axial/medial JSN</b> | <b>501/1617</b> | <b>0.14/0.20</b> | <b>0.61[0.50-0.75]</b> | <b>2.03E-06</b> | <b>0.83</b>    | <b>0</b>           |
|            |                          | GWAS set 1                   | Hip OA with axial/medial JSN        | Hip OA with non-axial/medial JSN        | 425/1392        | 0.13/0.20        | 0.60[0.48-0.75]        | 3.13E-06        |                |                    |
|            |                          | GWAS set 2                   | Hip OA with axial/medial JSN        | Hip OA with non-axial/medial JSN        | 76/225          | 0.15/0.21        | 0.64[0.38-1.09]        | 9.19E-02        |                |                    |
|            |                          | GWAS                         | Hip OA with axial/medial JSN        | Population-based                        | 425/6500        | 0.13/0.20        | 0.63[0.52-0.78]        | 3.45E-06        |                |                    |
| rs17050727 | T                        | <b>Meta-analysis</b>         | <b>Hip OA with axial/medial JSN</b> | <b>Hip OA with non-axial/medial JSN</b> | <b>501/1617</b> | <b>0.18/0.12</b> | <b>1.65[1.35-2.01]</b> | <b>6.87E-07</b> | <b>0.97</b>    | <b>0</b>           |
|            |                          | GWAS set 1                   | Hip OA with axial/medial JSN        | Hip OA with non-axial/medial JSN        | 425/1392        | 0.18/0.12        | 1.65[1.33-2.05]        | 7.13E-06        |                |                    |
|            |                          | GWAS set 2                   | Hip OA with axial/medial JSN        | Hip OA with non-axial/medial JSN        | 76/225          | 0.19/0.12        | 1.64[1.00-2.69]        | 5.52E-02        |                |                    |
|            |                          | GWAS                         | Hip OA with axial/medial JSN        | Population-based                        | 425/6500        | 0.18/0.14        | 1.43[1.19-1.72]        | 2.01E-04        |                |                    |
|            |                          | <b>Meta-analysis</b>         | <b>Hip OA with superior JSN</b>     | <b>Hip OA with non-superior JSN</b>     | <b>1469/649</b> | <b>0.12/0.17</b> | <b>0.67[0.56-0.81]</b> | <b>3.24E-05</b> | <b>0.58</b>    | <b>0</b>           |
|            |                          | GWAS set 1                   | Hip OA with superior JSN            | Hip OA with non-superior JSN            | 1265/552        | 0.12/0.17        | 0.66[0.53-0.80]        | 6.21E-05        |                |                    |
| GWAS set 2 | Hip OA with superior JSN | Hip OA with non-superior JSN | 204/97                              | 0.13/0.16                               | 0.76[0.47-1.23] | 2.66E-01         |                        |                 |                |                    |

|            |   |                      |                                          |                                              |                 |                  |                        |                 |             |           |
|------------|---|----------------------|------------------------------------------|----------------------------------------------|-----------------|------------------|------------------------|-----------------|-------------|-----------|
|            |   | GWAS                 | Hip OA with superior JSN                 | Population-based                             | 1265/6500       | 0.12/0.14        | 0.87[0.76-0.99]        | 3.89E-02        |             |           |
|            |   | GWAS                 | Hip OA                                   | Population-based                             | 1817/6500       | 0.14/0.14        | 1.00[0.90-1.12]        | 9.78E-01        |             |           |
| rs6766414  | G | <b>Meta-analysis</b> | <b>Hip OA with hypertrophic response</b> | <b>Hip OA with non-hypertrophic response</b> | <b>637/1481</b> | <b>0.29/0.22</b> | <b>1.45[1.24-1.69]</b> | <b>3.13E-06</b> | <b>0.52</b> | <b>0</b>  |
|            |   | GWAS set 1           | Hip OA with hypertrophic response        | Hip OA with non-hypertrophic response        | 531/1286        | 0.28/0.22        | 1.42[1.20-1.68]        | 5.84E-05        |             |           |
|            |   | GWAS set 2           | Hip OA with hypertrophic response        | Hip OA with non-hypertrophic response        | 106/195         | 0.31/0.22        | 1.63[1.10-2.42]        | 1.48E-02        |             |           |
|            |   | GWAS                 | Hip OA with hypertrophic response        | Population-based                             | 531/6500        | 0.28/0.24        | 1.25[1.09-1.44]        | 1.74E-03        |             |           |
|            |   | GWAS set 1           | Hip OA with atrophic response            | Hip OA with non-atrophic response            | 267/1550        | 0.22/0.24        | 0.86[0.68-1.08]        | 1.79E-01        |             |           |
|            |   | GWAS                 | Hip OA with atrophic response            | Population-based                             | 267/6500        | 0.22/0.24        | 0.88[0.72-1.09]        | 2.44E-01        |             |           |
|            |   | GWAS                 | Hip OA                                   | Population-based                             | 1817/6500       | 0.24/0.24        | 1.00[0.92-1.09]        | 9.76E-01        |             |           |
| rs61837881 | C | <b>Meta-analysis</b> | <b>Hip OA with hypertrophic response</b> | <b>Hip OA with non-hypertrophic response</b> | <b>637/1481</b> | <b>0.29/0.22</b> | <b>1.44[1.23-1.68]</b> | <b>4.56E-06</b> | <b>0.27</b> | <b>16</b> |
|            |   | GWAS set 1           | Hip OA with hypertrophic response        | Hip OA with non-hypertrophic response        | 531/1286        | 0.29/0.23        | 1.39[1.18-1.64]        | 1.10E-04        |             |           |
|            |   | GWAS set 2           | Hip OA with hypertrophic response        | Hip OA with non-hypertrophic response        | 106/195         | 0.29/0.20        | 1.80[1.17-2.76]        | 7.14E-03        |             |           |
|            |   | GWAS                 | Hip OA with hypertrophic response        | Population-based                             | 531/6500        | 0.29/0.23        | 1.33[1.15-1.53]        | 1.28E-04        |             |           |
|            |   | GWAS set 1           | Hip OA with atrophic response            | Hip OA with non-atrophic response            | 267/1550        | 0.24/0.24        | 0.96[0.77-1.19]        | 6.93E-01        |             |           |
|            |   | GWAS                 | Hip OA with atrophic response            | Population-based                             | 267/6500        | 0.24/0.23        | 1.02[0.82-1.25]        | 8.79E-01        |             |           |
|            |   | GWAS                 | Hip OA                                   | Population-based                             | 1817/6500       | 0.24/0.23        | 1.06[0.97-1.15]        | 2.28E-01        |             |           |
| rs16869403 | G | <b>GWAS set 1</b>    | <b>Hip OA with atrophic response</b>     | <b>Hip OA with non-atrophic response</b>     | <b>267/1550</b> | <b>0.17/0.09</b> | <b>2.11[1.61-2.75]</b> | <b>1.37E-07</b> |             |           |
|            |   | GWAS                 | Hip OA with atrophic response            | Population-based                             | 267/6500        | 0.17/0.10        | 1.93[1.52-2.46]        | 4.14E-07        |             |           |
|            |   | Meta-analysis        | Hip OA with hypertrophic response        | Hip OA with non-hypertrophic response        | 637/1481        | 0.09/0.10        | 0.86[0.69-1.08]        | 2.08E-01        | 0.63        | 0         |
|            |   | GWAS set 1           | Hip OA with hypertrophic response        | Hip OA with non-hypertrophic response        | 531/1286        | 0.09/0.10        | 0.84[0.65-1.08]        | 1.75E-01        |             |           |
|            |   | GWAS set 2           | Hip OA with hypertrophic response        | Hip OA with non-hypertrophic response        | 106/195         | 0.10/0.10        | 0.97[0.57-1.64]        | 9.09E-01        |             |           |
|            |   | GWAS                 | Hip OA with hypertrophic                 | Population-based                             | 531/6500        | 0.09/0.10        | 0.93[0.74-1.16]        | 5.14E-01        |             |           |



|  |      |          |                  |           |           |                 |          |  |  |
|--|------|----------|------------------|-----------|-----------|-----------------|----------|--|--|
|  |      | response |                  |           |           |                 |          |  |  |
|  | GWAS | Hip OA   | Population-based | 1817/6500 | 0.10/0.10 | 1.05[0.93-1.19] | 4.28E-01 |  |  |

**Table S2.** Summary statistics of the associated variants before and after adjustment for sex, height and body mass index in the first set of arcOGEN cases.

SNP, single nucleotide polymorphism; JSN, joint space narrowing.

| SNP        | Cases Definition                  | Controls definition                   | N case/control | P        | P_adjusted |
|------------|-----------------------------------|---------------------------------------|----------------|----------|------------|
| rs754106   | Hip OA with superior JSN          | Hip OA with non-superior JSN          | 1234/525       | 4.10E-06 | 5.25E-05   |
| rs754106   | Hip OA with axial/medial JSN      | Hip OA with non-axial/medial JSN      | 404/1355       | 1.05E-05 | 1.75E-04   |
| rs73023563 | Hip OA with superior JSN          | Hip OA with non-superior JSN          | 1234/525       | 2.34E-07 | 1.80E-07   |
| rs17050727 | Hip OA with axial/medial JSN      | Hip OA with non-axial/medial JSN      | 1234/525       | 4.35E-05 | 4.68E-05   |
| rs73023563 | Hip OA with axial/medial JSN      | Hip OA with non-axial/medial JSN      | 404/1355       | 1.74E-06 | 1.14E-06   |
| rs6766414  | Hip OA with hypertrophic response | Hip OA with non-hypertrophic response | 518/1241       | 2.90E-05 | 3.19E-05   |
| rs61837881 | Hip OA with hypertrophic response | Hip OA with non-hypertrophic response | 518/1241       | 1.97E-04 | 2.37E-04   |

**Table S3.** Validation of top signals by Sequenom MassARRAY iPLEX Gold assay.

SNP, single nucleotide polymorphism; EA, effect allele; EAF, effect allele frequency; amvnam, hip osteoarthritis (OA) with axial/medial joint space narrowing vs. hip OA with non-axial/medial joint space narrowing; avna, hip OA with atrophic bone response vs. hip OA with non-atrophic response.

|            |    |         |                | Sequenom summary statistics |                       |           |              | GWAS summary statistics |                       |           |              |                  | Concordance between Sequenom and GWAS |                            |
|------------|----|---------|----------------|-----------------------------|-----------------------|-----------|--------------|-------------------------|-----------------------|-----------|--------------|------------------|---------------------------------------|----------------------------|
| SNP        | EA | Stratum | N case/control | OR [95%CI]                  | P                     | EAF cases | EAF controls | OR [95%CI]              | P                     | EAF cases | EAF controls | Imputation score | % Genotype concordance                | % Minor allele concordance |
| rs754106   | T  | amvnam  | 413/1366       | 1.43 [1.21-1.68]            | 1.35x10 <sup>-5</sup> | 0.393     | 0.479        | 1.42 [1.21-1.67]        | 1.37x10 <sup>-5</sup> | 0.393     | 0.478        | 1                | 100                                   | 100                        |
| rs16869403 | G  | avna    | 262/1517       | 2.05 [1.57-2.68]            | 3.33x10 <sup>-7</sup> | 0.170     | 0.092        | 2.11 [1.61-2.77]        | 2.36x10 <sup>-7</sup> | 0.164     | 0.088        | 0.97             | 99                                    | 97                         |

**Table S4.** Association summary statistics of established hip osteoarthritis loci across all strata examined.

SNP, single nucleotide polymorphism; EA, effect allele; EAF, effect allele frequency; JSN, joint space narrowing.

| Association summary statistics in discovery study |                      |    |      |       |                 |         | Association summary statistics in this study |                                       |            |                 |          |
|---------------------------------------------------|----------------------|----|------|-------|-----------------|---------|----------------------------------------------|---------------------------------------|------------|-----------------|----------|
| SNP                                               | Nearest gene(s)      | EA | Site | Sex   | OR[95%CI]       | P       | Definition of cases                          | Definition of controls                | Analysis   | OR[95%CI]       | P        |
| rs12982744                                        | <i>DOT1L</i>         | C  | Hip  | Males | 1.17[1.11-1.23] | 7.8E-09 | Hip OA                                       | Population-based                      | GWAS       | 1.15[1.07-1.24] | 3.06E-04 |
|                                                   |                      |    |      |       |                 |         | Hip OA with axial/medial JSN                 | Population-based                      | GWAS       | 0.98[0.85-1.14] | 8.33E-01 |
|                                                   |                      |    |      |       |                 |         | Hip OA with axial/medial JSN                 | Hip OA with non-axial/medial JSN      | GWAS set 1 | 0.81[0.69-0.95] | 1.13E-02 |
|                                                   |                      |    |      |       |                 |         | Hip OA with axial/medial JSN                 | Hip OA with non-axial/medial JSN      | GWAS set 2 | 0.94[0.64-1.38] | 7.62E-01 |
|                                                   |                      |    |      |       |                 |         | Hip OA with superior JSN                     | Population-based                      | GWAS       | 1.22[1.12-1.34] | 8.17E-06 |
|                                                   |                      |    |      |       |                 |         | Hip OA with superior JSN                     | Hip OA with non-superior JSN          | GWAS set 1 | 1.22[1.06-1.42] | 7.58E-03 |
|                                                   |                      |    |      |       |                 |         | Hip OA with superior JSN                     | Hip OA with non-superior JSN          | GWAS set 2 | 1.02[0.71-1.45] | 9.34E-01 |
|                                                   |                      |    |      |       |                 |         | Hip OA with atrophic bone response           | Population-based                      | GWAS       | 1.35[1.12-1.62] | 1.39E-03 |
|                                                   |                      |    |      |       |                 |         | Hip OA with atrophic bone response           | Hip OA with non-atrophic response     | GWAS       | 1.20[0.99-1.46] | 6.33E-02 |
|                                                   |                      |    |      |       |                 |         | Hip OA with hypertrophic bone response       | Population-based                      | GWAS       | 1.12[0.99-1.28] | 7.62E-02 |
|                                                   |                      |    |      |       |                 |         | Hip OA with hypertrophic bone response       | Hip OA with non-hypertrophic response | GWAS set 1 | 0.97[0.83-1.12] | 6.63E-01 |
|                                                   |                      |    |      |       |                 |         | Hip OA with hypertrophic bone response       | Hip OA with non-hypertrophic response | GWAS set 2 | 0.95[0.67-1.34] | 7.51E-01 |
| rs9350591                                         | <i>FILIP1; SENP6</i> | T  | Hip  | Both  | 1.18[1.12-1.25] | 2.4E-09 | Hip OA                                       | Population-based                      | GWAS       | 1.17[1.04-1.30] | 7.01E-03 |
|                                                   |                      |    |      |       |                 |         | Hip OA with axial/medial JSN                 | Population-based                      | GWAS       | 1.36[1.12-1.66] | 3.11E-03 |
|                                                   |                      |    |      |       |                 |         | Hip OA with axial/medial JSN                 | Hip OA with non-axial/medial JSN      | GWAS set 1 | 1.23[0.98-1.53] | 7.47E-02 |
|                                                   |                      |    |      |       |                 |         | Hip OA with axial/medial JSN                 | Hip OA with non-axial/medial JSN      | GWAS set 2 | 1.21[0.74-1.98] | 4.42E-01 |
|                                                   |                      |    |      |       |                 |         | Hip OA with superior JSN                     | Population-based                      | GWAS       | 1.05[0.92-1.20] | 4.94E-01 |

|            |               |   |            |       |                 |         |                                        |                                       |            |                 |          |
|------------|---------------|---|------------|-------|-----------------|---------|----------------------------------------|---------------------------------------|------------|-----------------|----------|
|            |               |   |            |       |                 |         | Hip OA with superior JSN               | Hip OA with non-superior JSN          | GWAS set 1 | 0.72[0.59-0.88] | 1.73E-03 |
|            |               |   |            |       |                 |         | Hip OA with superior JSN               | Hip OA with non-superior JSN          | GWAS set 2 | 0.85[0.53-1.34] | 4.77E-01 |
|            |               |   |            |       |                 |         | Hip OA with atrophic bone response     | Population-based                      | GWAS       | 1.11[0.85-1.44] | 4.57E-01 |
|            |               |   |            |       |                 |         | Hip OA with atrophic bone response     | Hip OA with non-atrophic response     | GWAS       | 0.94[0.71-1.24] | 6.60E-01 |
|            |               |   |            |       |                 |         | Hip OA with hypertrophic bone response | Population-based                      | GWAS       | 1.12[0.92-1.35] | 2.64E-01 |
|            |               |   |            |       |                 |         | Hip OA with hypertrophic bone response | Hip OA with non-hypertrophic response | GWAS set 1 | 0.94[0.76-1.16] | 5.68E-01 |
|            |               |   |            |       |                 |         | Hip OA with hypertrophic bone response | Hip OA with non-hypertrophic response | GWAS set 2 | 0.81[0.51-1.31] | 3.88E-01 |
| rs10948172 | <i>SUPT3H</i> | G | Hip & knee | Males | 1.14[1.09-1.20] | 7.9E-08 | Hip OA                                 | Population-based                      | GWAS       | 1.13[1.04-1.22] | 3.77E-03 |
|            |               |   |            |       |                 |         | Hip OA with axial/medial JSN           | Population-based                      | GWAS       | 1.24[1.07-1.44] | 4.84E-03 |
|            |               |   |            |       |                 |         | Hip OA with axial/medial JSN           | Hip OA with non-axial/medial JSN      | GWAS set 1 | 1.13[0.96-1.33] | 1.42E-01 |
|            |               |   |            |       |                 |         | Hip OA with axial/medial JSN           | Hip OA with non-axial/medial JSN      | GWAS set 2 | 1.01[0.69-1.50] | 9.47E-01 |
|            |               |   |            |       |                 |         | Hip OA with superior JSN               | Population-based                      | GWAS       | 1.09[0.99-1.20] | 7.49E-02 |
|            |               |   |            |       |                 |         | Hip OA with superior JSN               | Hip OA with non-superior JSN          | GWAS set 1 | 0.90[0.77-1.04] | 1.61E-01 |
|            |               |   |            |       |                 |         | Hip OA with superior JSN               | Hip OA with non-superior JSN          | GWAS set 2 | 0.81[0.56-1.16] | 2.41E-01 |
|            |               |   |            |       |                 |         | Hip OA with atrophic bone response     | Population-based                      | GWAS       | 1.14[0.94-1.37] | 1.82E-01 |
|            |               |   |            |       |                 |         | Hip OA with atrophic bone response     | Hip OA with non-atrophic response     | GWAS       | 1.01[0.83-1.23] | 9.18E-01 |
|            |               |   |            |       |                 |         | Hip OA with hypertrophic bone response | Population-based                      | GWAS       | 1.18[1.03-1.35] | 1.52E-02 |
|            |               |   |            |       |                 |         | Hip OA with hypertrophic bone response | Hip OA with non-hypertrophic response | GWAS set 1 | 1.07[0.92-1.24] | 3.84E-01 |
|            |               |   |            |       |                 |         | Hip OA with hypertrophic bone response | Hip OA with non-hypertrophic response | GWAS set 2 | 0.98[0.68-1.40] | 9.04E-01 |
| rs11177    | <i>GNL3</i>   | A | Hip & knee | Both  | 1.12[1.08-1.16] | 1.3E-10 | Hip OA                                 | Population-based                      | GWAS       | 1.17[1.08-1.25] | 5.42E-05 |
|            |               |   |            |       |                 |         | Hip OA with axial/medial JSN           | Population-based                      | GWAS       | 1.01[0.88-1.16] | 8.81E-01 |

|           |       |   |     |         |                |         |                                        |                                       |            |                 |          |
|-----------|-------|---|-----|---------|----------------|---------|----------------------------------------|---------------------------------------|------------|-----------------|----------|
|           |       |   |     |         |                |         | Hip OA with axial/medial JSN           | Hip OA with non-axial/medial JSN      | GWAS set 1 | 0.84[0.72-0.97] | 2.16E-02 |
|           |       |   |     |         |                |         | Hip OA with axial/medial JSN           | Hip OA with non-axial/medial JSN      | GWAS set 2 | 0.90[0.62-1.31] | 5.89E-01 |
|           |       |   |     |         |                |         | Hip OA with superior JSN               | Population-based                      | GWAS       | 1.21[1.11-1.31] | 1.97E-05 |
|           |       |   |     |         |                |         | Hip OA with superior JSN               | Hip OA with non-superior JSN          | GWAS set 1 | 1.11[0.97-1.28] | 1.29E-01 |
|           |       |   |     |         |                |         | Hip OA with superior JSN               | Hip OA with non-superior JSN          | GWAS set 2 | 1.09[0.77-1.54] | 6.39E-01 |
|           |       |   |     |         |                |         | Hip OA with atrophic bone response     | Population-based                      | GWAS       | 1.06[0.89-1.27] | 5.10E-01 |
|           |       |   |     |         |                |         | Hip OA with atrophic bone response     | Hip OA with non-atrophic response     | GWAS       | 0.90[0.75-1.08] | 2.53E-01 |
|           |       |   |     |         |                |         | Hip OA with hypertrophic bone response | Population-based                      | GWAS       | 1.09[0.96-1.24] | 1.86E-01 |
|           |       |   |     |         |                |         | Hip OA with hypertrophic bone response | Hip OA with non-hypertrophic response | GWAS set 1 | 0.91[0.79-1.05] | 1.99E-01 |
|           |       |   |     |         |                |         | Hip OA with hypertrophic bone response | Hip OA with non-hypertrophic response | GWAS set 2 | 1.31[0.93-1.84] | 1.17E-01 |
| rs4836732 | ASTN2 | C | Hip | Females | 1.2[1.13-1.27] | 6.1E-10 | Hip OA                                 | Population-based                      | GWAS       | 1.11[1.03-1.20] | 4.66E-03 |
|           |       |   |     |         |                |         | Hip OA with axial/medial JSN           | Population-based                      | GWAS       | 1.04[0.91-1.19] | 5.75E-01 |
|           |       |   |     |         |                |         | Hip OA with axial/medial JSN           | Hip OA with non-axial/medial JSN      | GWAS set 1 | 0.92[0.79-1.07] | 2.68E-01 |
|           |       |   |     |         |                |         | Hip OA with axial/medial JSN           | Hip OA with non-axial/medial JSN      | GWAS set 2 | 0.89[0.62-1.29] | 5.45E-01 |
|           |       |   |     |         |                |         | Hip OA with superior JSN               | Population-based                      | GWAS       | 1.13[1.04-1.23] | 5.84E-03 |
|           |       |   |     |         |                |         | Hip OA with superior JSN               | Hip OA with non-superior JSN          | GWAS set 1 | 1.05[0.91-1.20] | 5.36E-01 |
|           |       |   |     |         |                |         | Hip OA with superior JSN               | Hip OA with non-superior JSN          | GWAS set 2 | 1.07[0.76-1.50] | 6.88E-01 |
|           |       |   |     |         |                |         | Hip OA with atrophic bone response     | Population-based                      | GWAS       | 1.16[0.97-1.37] | 1.01E-01 |
|           |       |   |     |         |                |         | Hip OA with atrophic bone response     | Hip OA with non-atrophic response     | GWAS       | 1.05[0.87-1.26] | 6.28E-01 |
|           |       |   |     |         |                |         | Hip OA with hypertrophic bone response | Population-based                      | GWAS       | 1.11[0.98-1.25] | 1.17E-01 |
|           |       |   |     |         |                |         | Hip OA with hypertrophic bone response | Hip OA with non-hypertrophic response | GWAS set 1 | 0.99[0.86-1.14] | 9.03E-01 |

|           |        |   |     |      |                 |         |                                        |                                       |            |                 |          |
|-----------|--------|---|-----|------|-----------------|---------|----------------------------------------|---------------------------------------|------------|-----------------|----------|
|           |        |   |     |      |                 |         | Hip OA with hypertrophic bone response | Hip OA with non-hypertrophic response | GWAS set 2 | 1.18[0.84-1.64] | 3.39E-01 |
| rs6094710 | NCOA3  | A | Hip | Both | 1.28[1.18-1.39] | 7.9E-09 | Hip OA                                 | Population-based                      | GWAS       | 1.26[1.04-1.54] | 2.32E-02 |
|           |        |   |     |      |                 |         | Hip OA with axial/medial JSN           | Population-based                      | GWAS       | 1.50[1.07-2.10] | 2.49E-02 |
|           |        |   |     |      |                 |         | Hip OA with axial/medial JSN           | Hip OA with non-axial/medial JSN      | GWAS set 1 | 1.28[0.87-1.87] | 2.23E-01 |
|           |        |   |     |      |                 |         | Hip OA with axial/medial JSN           | Hip OA with non-axial/medial JSN      | GWAS set 2 | 0.67[0.25-1.78] | 4.01E-01 |
|           |        |   |     |      |                 |         | Hip OA with superior JSN               | Population-based                      | GWAS       | 1.19[0.94-1.50] | 1.49E-01 |
|           |        |   |     |      |                 |         | Hip OA with superior JSN               | Hip OA with non-superior JSN          | GWAS set 1 | 0.83[0.58-1.19] | 3.16E-01 |
|           |        |   |     |      |                 |         | Hip OA with superior JSN               | Hip OA with non-superior JSN          | GWAS set 2 | 1.68[0.67-4.19] | 2.46E-01 |
|           |        |   |     |      |                 |         | Hip OA with atrophic bone response     | Population-based                      | GWAS       | 1.33[0.85-2.09] | 2.34E-01 |
|           |        |   |     |      |                 |         | Hip OA with atrophic bone response     | Hip OA with non-atrophic response     | GWAS       | 1.05[0.65-1.72] | 8.34E-01 |
|           |        |   |     |      |                 |         | Hip OA with hypertrophic bone response | Population-based                      | GWAS       | 1.57[1.16-2.13] | 6.58E-03 |
|           |        |   |     |      |                 |         | Hip OA with hypertrophic bone response | Hip OA with non-hypertrophic response | GWAS set 1 | 1.36[0.95-1.96] | 9.93E-02 |
|           |        |   |     |      |                 |         | Hip OA with hypertrophic bone response | Hip OA with non-hypertrophic response | GWAS set 2 | 1.27[0.58-2.76] | 5.49E-01 |
| rs835487  | CHST11 | G | Hip | Both | 1.13[1.09-1.18] | 1.6E-08 | Hip OA                                 | Population-based                      | GWAS       | 1.17[1.09-1.27] | 4.28E-05 |
|           |        |   |     |      |                 |         | Hip OA with axial/medial JSN           | Population-based                      | GWAS       | 1.09[0.94-1.26] | 2.37E-01 |
|           |        |   |     |      |                 |         | Hip OA with axial/medial JSN           | Hip OA with non-axial/medial JSN      | GWAS set 1 | 0.91[0.77-1.07] | 2.38E-01 |
|           |        |   |     |      |                 |         | Hip OA with axial/medial JSN           | Hip OA with non-axial/medial JSN      | GWAS set 2 | 1.50[1.03-2.20] | 3.62E-02 |
|           |        |   |     |      |                 |         | Hip OA with superior JSN               | Population-based                      | GWAS       | 1.19[1.09-1.30] | 1.73E-04 |
|           |        |   |     |      |                 |         | Hip OA with superior JSN               | Hip OA with non-superior JSN          | GWAS set 1 | 1.03[0.89-1.20] | 6.56E-01 |
|           |        |   |     |      |                 |         | Hip OA with superior JSN               | Hip OA with non-superior JSN          | GWAS set 2 | 0.77[0.54-1.10] | 1.45E-01 |
|           |        |   |     |      |                 |         | Hip OA with atrophic bone response     | Population-based                      | GWAS       | 1.26[1.05-1.50] | 1.22E-02 |

|            |                      |   |            |         |                 |         |                                        |                                       |            |                 |          |
|------------|----------------------|---|------------|---------|-----------------|---------|----------------------------------------|---------------------------------------|------------|-----------------|----------|
|            |                      |   |            |         |                 |         | Hip OA with atrophic bone response     | Hip OA with non-atrophic response     | GWAS       | 1.09[0.90-1.32] | 3.79E-01 |
|            |                      |   |            |         |                 |         | Hip OA with hypertrophic bone response | Population-based                      | GWAS       | 1.18[1.03-1.34] | 1.40E-02 |
|            |                      |   |            |         |                 |         | Hip OA with hypertrophic bone response | Hip OA with non-hypertrophic response | GWAS set 1 | 1.01[0.86-1.17] | 9.39E-01 |
|            |                      |   |            |         |                 |         | Hip OA with hypertrophic bone response | Hip OA with non-hypertrophic response | GWAS set 2 | 1.20[0.85-1.70] | 3.10E-01 |
| rs8044769  | <i>FTO</i>           | C | Hip & knee | Females | 1.11[1.07-1.15] | 6.9E-08 | Hip OA                                 | Population-based                      | GWAS       | 1.13[1.05-1.22] | 8.92E-04 |
|            |                      |   |            |         |                 |         | Hip OA with axial/medial JSN           | Population-based                      | GWAS       | 1.17[1.02-1.34] | 2.89E-02 |
|            |                      |   |            |         |                 |         | Hip OA with axial/medial JSN           | Hip OA with non-axial/medial JSN      | GWAS set 1 | 1.04[0.89-1.21] | 6.20E-01 |
|            |                      |   |            |         |                 |         | Hip OA with axial/medial JSN           | Hip OA with non-axial/medial JSN      | GWAS set 2 | 1.40[0.95-2.06] | 9.02E-02 |
|            |                      |   |            |         |                 |         | Hip OA with superior JSN               | Population-based                      | GWAS       | 1.12[1.03-1.22] | 8.36E-03 |
|            |                      |   |            |         |                 |         | Hip OA with superior JSN               | Hip OA with non-superior JSN          | GWAS set 1 | 0.97[0.84-1.12] | 6.48E-01 |
|            |                      |   |            |         |                 |         | Hip OA with superior JSN               | Hip OA with non-superior JSN          | GWAS set 2 | 0.75[0.52-1.08] | 1.17E-01 |
|            |                      |   |            |         |                 |         | Hip OA with atrophic bone response     | Population-based                      | GWAS       | 1.12[0.94-1.33] | 2.18E-01 |
|            |                      |   |            |         |                 |         | Hip OA with atrophic bone response     | Hip OA with non-atrophic response     | GWAS       | 0.98[0.82-1.18] | 8.38E-01 |
|            |                      |   |            |         |                 |         | Hip OA with hypertrophic bone response | Population-based                      | GWAS       | 1.16[1.02-1.32] | 2.11E-02 |
|            |                      |   |            |         |                 |         | Hip OA with hypertrophic bone response | Hip OA with non-hypertrophic response | GWAS set 1 | 1.03[0.89-1.19] | 6.62E-01 |
|            |                      |   |            |         |                 |         | Hip OA with hypertrophic bone response | Hip OA with non-hypertrophic response | GWAS set 2 | 1.13[0.80-1.59] | 5.03E-01 |
| rs10492367 | <i>KLHDC5; PTHLH</i> | T | Hip        | Both    | 1.14[1.09-1.20] | 1.5E-08 | Hip OA                                 | Population-based                      | GWAS       | 1.12[1.02-1.23] | 1.87E-02 |
|            |                      |   |            |         |                 |         | Hip OA with axial/medial JSN           | Population-based                      | GWAS       | 1.11[0.93-1.32] | 2.54E-01 |
|            |                      |   |            |         |                 |         | Hip OA with axial/medial JSN           | Hip OA with non-axial/medial JSN      | GWAS set 1 | 0.99[0.81-1.20] | 8.99E-01 |
|            |                      |   |            |         |                 |         | Hip OA with axial/medial JSN           | Hip OA with non-axial/medial JSN      | GWAS set 2 | 0.95[0.19-4.82] | 9.48E-01 |
|            |                      |   |            |         |                 |         | Hip OA with superior JSN               | Population-based                      | GWAS       | 1.12[1.01-1.25] | 3.52E-02 |



|            |       |   |            |      |                 |         |                                        |                                       |            |                 |          |
|------------|-------|---|------------|------|-----------------|---------|----------------------------------------|---------------------------------------|------------|-----------------|----------|
|            |       |   |            |      |                 |         | Hip OA with superior JSN               | Hip OA with non-superior JSN          | GWAS set 1 | 1.01[0.85-1.21] | 8.80E-01 |
|            |       |   |            |      |                 |         | Hip OA with superior JSN               | Hip OA with non-superior JSN          | GWAS set 2 | 0.85[0.20-3.49] | 8.19E-01 |
|            |       |   |            |      |                 |         | Hip OA with atrophic bone response     | Population-based                      | GWAS       | 1.10[0.89-1.37] | 3.79E-01 |
|            |       |   |            |      |                 |         | Hip OA with atrophic bone response     | Hip OA with non-atrophic response     | GWAS       | 0.98[0.78-1.24] | 8.95E-01 |
|            |       |   |            |      |                 |         | Hip OA with hypertrophic bone response | Population-based                      | GWAS       | 1.19[1.02-1.39] | 3.13E-02 |
|            |       |   |            |      |                 |         | Hip OA with hypertrophic bone response | Hip OA with non-hypertrophic response | GWAS set 1 | 1.09[0.91-1.30] | 3.41E-01 |
|            |       |   |            |      |                 |         | Hip OA with hypertrophic bone response | Hip OA with non-hypertrophic response | GWAS set 2 | 1.91[0.46-7.91] | 3.67E-01 |
| rs11842874 | MCF2L | A | Knee & Hip | Both | 1.17[1.11-1.23] | 2.1E-08 | Hip OA                                 | Population-based                      | GWAS       | 1.07[0.93-1.23] | 3.66E-01 |
|            |       |   |            |      |                 |         | Hip OA with axial/medial JSN           | Population-based                      | GWAS       | 1.12[0.86-1.47] | 3.96E-01 |
|            |       |   |            |      |                 |         | Hip OA with axial/medial JSN           | Hip OA with non-axial/medial JSN      | GWAS set 1 | 1.07[0.79-1.45] | 6.56E-01 |
|            |       |   |            |      |                 |         | Hip OA with axial/medial JSN           | Hip OA with non-axial/medial JSN      | GWAS set 2 | 1.57[0.66-3.74] | 2.86E-01 |
|            |       |   |            |      |                 |         | Hip OA with superior JSN               | Population-based                      | GWAS       | 1.07[0.91-1.26] | 4.14E-01 |
|            |       |   |            |      |                 |         | Hip OA with superior JSN               | Hip OA with non-superior JSN          | GWAS set 1 | 1.01[0.77-1.33] | 9.38E-01 |
|            |       |   |            |      |                 |         | Hip OA with superior JSN               | Hip OA with non-superior JSN          | GWAS set 2 | 1.27[0.62-2.57] | 5.19E-01 |
|            |       |   |            |      |                 |         | Hip OA with atrophic bone response     | Population-based                      | GWAS       | 1.23[0.86-1.75] | 2.38E-01 |
|            |       |   |            |      |                 |         | Hip OA with atrophic bone response     | Hip OA with non-atrophic response     | GWAS       | 1.18[0.81-1.73] | 3.70E-01 |
|            |       |   |            |      |                 |         | Hip OA with hypertrophic bone response | Population-based                      | GWAS       | 1.09[0.86-1.39] | 4.82E-01 |
|            |       |   |            |      |                 |         | Hip OA with hypertrophic bone response | Hip OA with non-hypertrophic response | GWAS set 1 | 1.03[0.78-1.36] | 8.28E-01 |
|            |       |   |            |      |                 |         | Hip OA with hypertrophic bone response | Hip OA with non-hypertrophic response | GWAS set 2 | 0.81[0.40-1.63] | 5.59E-01 |
